# Supplementary material for: Comparative Study on Fatty Acids Composition of Lemna minor (Duckweed) Cultured in Indoor Plastic Tanks and Outdoor Earthen Ponds
Source: Hindawi journal article supplement (doi:10.1155/2024/5563513), 2024-01-01
Supplement: f1 [file 5563513.f1.pdf]

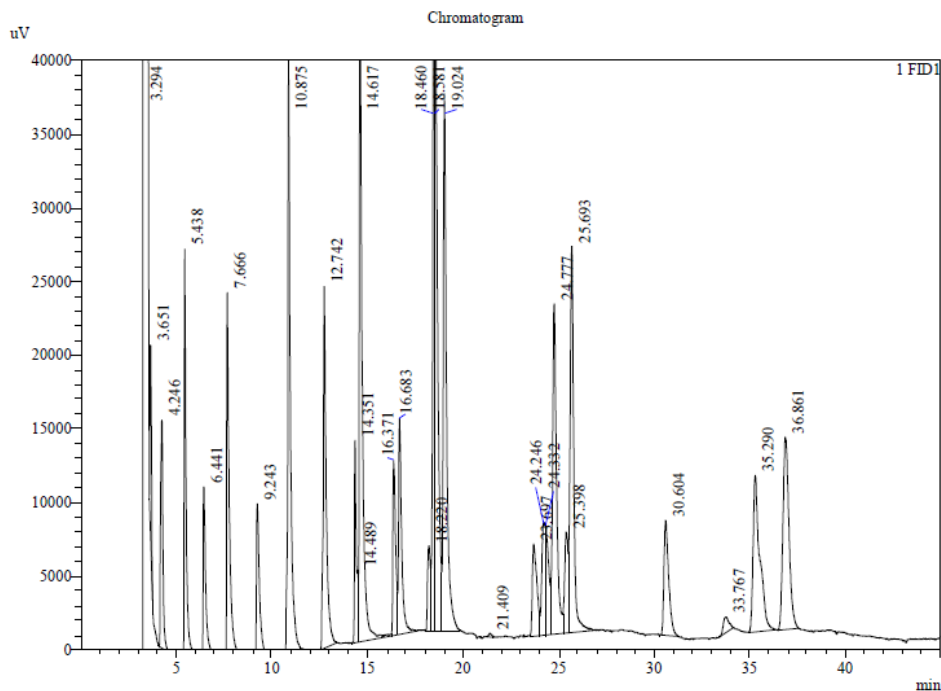

**Figure 1. GC FID Standard Chromatogram**

**Table 1: GC FID qualitative data for standards', retention times, peak area and time.**

| FID1  |                      | QuantitativeResult |            |           |       |      |
|-------|----------------------|--------------------|------------|-----------|-------|------|
| ID#   | Name                 | Ret. Time          | Area       | Height    | Conc. | Unit |
| 1     | butyric              | 3.294              | 1004447583 | 161750874 | 0.000 | ppm  |
| 2     | caprylic             | 3.651              | 74979      | 13035     | 0.000 | ppm  |
| 3     | capric               | 4.246              | 131962     | 15510     | 0.000 | ppm  |
| 4     | lauric               | 5.438              | 183445     | 27642     | 0.000 | ppm  |
| 5     | tridecanoic          | 6.441              | 105302     | 11459     | 0.000 | ppm  |
| 6     | myristic             | 7.666              | 231571     | 24752     | 0.000 | ppm  |
| 7     | myristoleic          | 9.243              | 117844     | 10561     | 0.000 | ppm  |
| 8     | pentadecanoic        | 10.875             | 394590     | 40652     | 0.000 | ppm  |
| 9     | palmitic             | 12.742             | 262180     | 24575     | 0.000 | ppm  |
| 10    | palmitoleic          | 14.351             | 78996      | 13733     | 0.000 | ppm  |
| 11    | heptadecanoic        | 14.489             | 19848      | 4922      | 0.000 | ppm  |
| 12    | cis 10 heptadecanoic | 14.617             | 488071     | 51501     | 0.000 | ppm  |
| 13    | stearic              | 16.371             | 120166     | 11900     | 0.000 | ppm  |
| 14    | oleic                | 16.683             | 162338     | 14729     | 0.000 | ppm  |
| 15    | elaidic              | 18.220             | 57374      | 5759      | 0.000 | ppm  |
| 16    | linoleic             | 18.460             | 338323     | 47709     | 0.000 | ppm  |
| 17    | linolenic            | 18.581             | 407230     | 39588     | 0.000 | ppm  |
| 18    | arachidic            | 19.024             | 437351     | 36506     | 0.000 | ppm  |
| 19    | eicosanoic           | 21.409             | 2549       | 259       | 0.000 | ppm  |
| 20    | cis eicosatrienoic   | 23.697             | 104374     | 6269      | 0.000 | ppm  |
| 21    | epa                  | 24.246             | 94790      | 7676      | 0.000 | ppm  |
| 22    | euracic              | 24.332             | 87025      | 7461      | 0.000 | ppm  |
| 23    | unkwown              | 24.777             | 322482     | 22445     | 0.000 | ppm  |
| 24    | behenic              | 25.398             | 84319      | 6851      | 0.000 | ppm  |
| 25    | unkwown              | 25.693             | 351818     | 26216     | 0.000 | ppm  |
| 26    | dha                  | 30.604             | 134689     | 7800      | 0.000 | ppm  |
| 27    | triosanoic           | 33.767             | 21842      | 1058      | 0.000 | ppm  |
| 28    | lignoceric           | 35.290             | 258226     | 10627     | 0.000 | ppm  |
| 29    | nervonic             | 36.861             | 286575     | 13053     | 0.000 | ppm  |
| Total |                      |                    | 1009807843 | 162255123 |       |      |

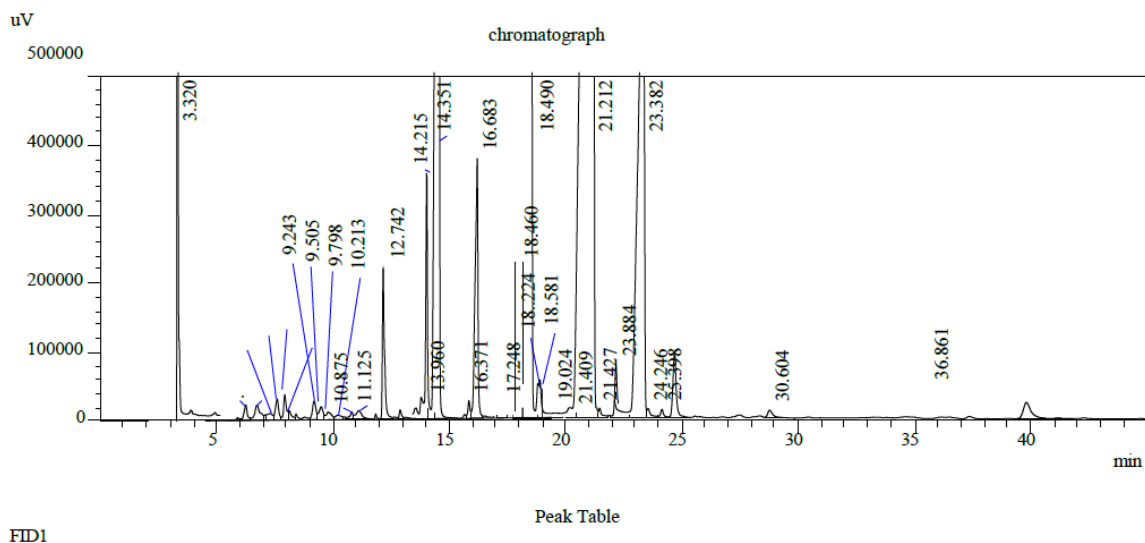

**Fig.2: Representative chromatogram of sample 1**

**Table 2 showing GC retention times and peak areas**

| ID#   | Name                 | Ret. Time | Area      | Conc. | Unit |
|-------|----------------------|-----------|-----------|-------|------|
| 1     | butyric              | 3.294     | 0         | 0     | %    |
| 2     | caprylic             | 3.651     | 0         | 0     | %    |
| 3     | capric               | 4.246     | 0         | 0     | %    |
| 4     | lauric               | 5.438     | 0         | 0     | %    |
| 5     | tridecanoic          | 6.441     | 0         | 0     | %    |
| 6     | myristic             | 7.666     | 0         | 0     | %    |
| 7     | myristoleic          | 9.243     | 7689568   | 1.16  | %    |
| 8     | pentadecanoic        | 10.875    | 5667788   | 0.84  | %    |
| 9     | palmitic             | 12.742    | 186944225 | 27.37 | %    |
| 10    | palmitoleic          | 14.351    | 25646783  | 3.57  | %    |
| 11    | heptadecanoic        | 14.489    | 0         | 0     | %    |
| 12    | cis 10 heptadecanoic | 14.617    | 0         | 0     | %    |
| 13    | stearic              | 16.371    | 62936744  | 9.3   | %    |
| 14    | oleic                | 16.683    | 163726543 | 23.99 | %    |
| 15    | elaidic              | 18.220    | 47893445  | 7.22  | %    |
| 16    | linoleic             | 18.460    | 60756335  | 9.15  | %    |
| 17    | linolaidic           | 18.490    | 5567888   | 0.84  | %    |
| 18    | linolenic            | 18.581    | 33979865  | 5.49  | %    |
| 19    | arachidic            | 19.024    | 19673211  | 2.96  | %    |
| 21    | eicosanoic           | 21.409    | 6758999   | 1.01  | %    |
| 24    | epa                  | 24.246    | 9218566   | 1.25  | %    |
| 25    | behenic              | 25.398    | 695777    | 0.1   | %    |
| 28    | dha                  | 30.604    | 34786735  | 5.09  | %    |
| 29    | lignoceric           | 35.290    | 0         | 0     | %    |
| 30    | nervonic             | 36.861    | 5473533   | 0.66  | %    |
| Total |                      |           | 675374926 | 100   | %    |

### How the FA content of any specific FA was calculated

The FAs were identified based on the retention times and relative abundances of the standard FID chromatograms. The sample's retention time were compared to that of the standards to identify the

fatty acids and the peak area to determine the % composition of the FAs. For example, from the table 2 and figure 2, the % fatty acid compositions of the most abundant 3 fatty acids in the sample namely palmitic, oleic and stearic acids are 27.37% at retention time of 12.74, 23.99% at retention time of 16.68 and 9.3% with retention time of 16.31 respectively. Similarly, the least abundant FA was behenic acid with a peak area of 0.1% at retention time of 25.39. Fatty acids such as butyric, caprylic and capric with retention times 3.29, 3.65 and 4.24 had 0% peak areas hence were considered absent in the sample.

**Table 3: Details of FAME Standards**

| <b>Company Name</b>                                             | <b>FAME Details</b>              |
|-----------------------------------------------------------------|----------------------------------|
| SUPELCO, 595 North Harrison Road, Bellamonte PA 16823-0048 USA. | F.A.M.E Mix GLC-10 CRM 1891 IAMP |
|                                                                 | F.A.M.E Mix GLC-20 1892 IAMP     |
|                                                                 | F.A.M.E Mix GLC-30 1893 IAMP     |
|                                                                 | F.A.M.E Mix GLC-40 1895 IAMP     |
